# Supplementary material for: Significant enhancement in the Seebeck coefficient and power factor of thermoelectric polymers by the Soret effect of polyelectrolytes
Source: Royal Society of Chemistry journal article supplement (doi:10.1039/c8ta08387h), 2018-01-01
Supplement: c8ta08387h1.pdf [file c8ta08387h1.pdf]

### Supporting Information

Significantly Enhancement in Seebeck Coefficient and Power Factor of Thermoelectric Polymers by Soret Effect of Polyelectrolytes

Xin Guan, Hanlin Cheng and Jianyong Ouyang\*

Department of Materials Science and Engineering, National University of Singapore, 7 Engineering Drive 1, Singapore, 117574

\* Corresponding Author.

E-mail: [mseoj@nus.edu.sg](mailto:mseoj@nus.edu.sg)

Materials and Methods

Table S1

### Materials and Methods

**Materials:** PEDOT:PSS aqueous solution (Clevios PH1000) was purchased from Heraeus. The concentration of PEDOT:PSS was 1.3 wt%, and the weight ratio of PSS to PEDOT was 2.5 in solution. Other chemical including PSSH and PSSNa were obtained from Sigma-Aldrich.

**Treatment of PEDOT:PSS films:** PEDOT:PSS films were prepared by spin-coating the PEDOT:PSS aqueous solution on glass substrates which were pre-cleaned successively with detergent, deionized water, acetone and isopropanol (IPA). They were dried at 120 °C on a hot plate for 20 min. They were then treated with 1 M H<sub>2</sub>SO<sub>4</sub> for 3 times as described in our previous works.<sup>1</sup> PSSH layer was prepared on the acid-treated PEDOT:PSS films by spin coating 300 μL of 1 wt% PSSH at 3000 rpm/min for 60 s. The PSSH/PEDOT:PSS films were dried overnight in air at room temperature. The procedure for the NaOH treatment of A-PEDOT:PSS is the same as our previous work.<sup>2</sup> Aqueous solution of 2.7 wt% PSSNa that has the same molar concentration of 1 wt% PSSH is also coated on A-PEDOT:PSS or BA-PEDOT:PSS.

**Characterization:** The electrical conductivities of the PEDOT:PSS films were measured by the van der Pauw four-probe technique using a Keithley 2400 source/meter. The thicknesses of the polymer films were determined with an Alpha 500 step profiler. The Seebeck coefficients were measured using a home-built system (the same as our previous works), which included two Peltier devices (TEC1-19906 by Beijing Geshang Electronic Pte. Ltd.) affixed on an alumina heat sink.<sup>2</sup> The temperature difference ( $\Delta T$ ) was detected with two T-type thermocouples of 25 μm in diameter (Omega, US), and the thermal voltage output ( $\Delta V$ ) was measured with a Keithley 2000 multimeter. For each sample, the  $\Delta V$  values were measured at seven different  $\Delta T$  values. The Seebeck coefficient of each film was extracted from the best linear fitting of the  $\Delta V$ - $\Delta T$  plots, and the coefficient of determination ( $R^2$ ) of fitting line is higher than 0.99. The output voltage was measured using a home-built system. The films for the output voltage measured had a length of 2.6 cm and a width of 1.5 cm. The distance between the two wires during voltage collection was 1.3 mm. The temperature gradient was 1 K. An external resistor that had a same resistance as the internal resistance of the sample was connected during the measurements. In-situ Raman spectra were collected in a back scattering configuration using a Jobin Yvon

Horiba LabRam HR 800 Raman system. A 514.5 nm Ar<sup>+</sup> was used as the excitation source.

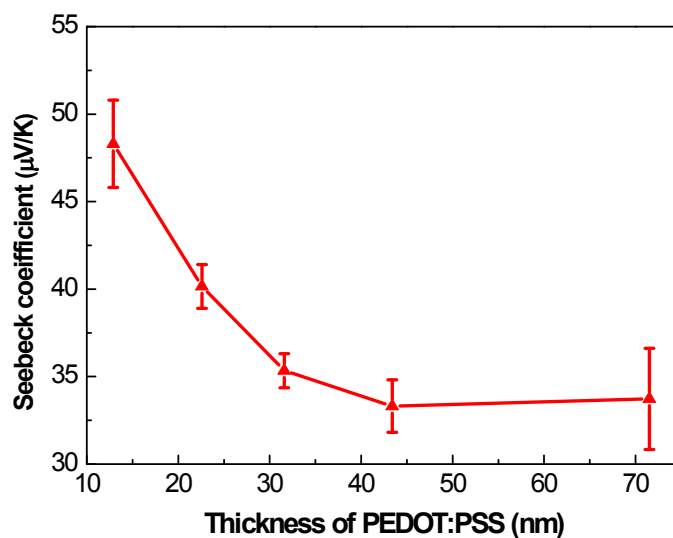

**Figure S1.** Variation of the Seebeck coefficient of PSSH/A-PEDOT:PSS films with the thickness of the A-PEDOT:PSS films.

**Table S1.** TE properties of A-PEDOT:PSS, BA-PEDOT:PSS, PSSH/A-PEDOT:PSS, PSSNa/A-PEDOT:PSS, and PSSNa/BA-PEDOT:PSS at the RH of 20%.

| Sample             | S (μV K <sup>-1</sup> ) | σ (S cm <sup>-1</sup> ) | PF (μW m <sup>-1</sup> K <sup>-2</sup> ) |
|--------------------|-------------------------|-------------------------|------------------------------------------|
| A-PEDOT:PSS        | 18.9                    | 3152                    | 112.6                                    |
| BA-PEDOT:PSS       | 36.1                    | 2122                    | 276.5                                    |
| PSSH/A-PEDOT:PSS   | 28.3                    | 2687                    | 215.2                                    |
| PSSNa/A-PEDOT:PSS  | 28.1                    | 2403                    | 189.7                                    |
| PSSNa/BA-PEDOT:PSS | 37.3                    | 2163                    | 300.9                                    |

S: Seebeck coefficient, σ: electrical conductivity, PF: power factor.

## References

1. Y. Xia, K. Sun and J. Ouyang, *Adv. Mater.*, 2012, **24**, 2436-2440.
2. Z. Fan, P. Li, D. Du, J. Ouyang, *Adv Energy Mater.* **2017**, 7, 1602116.
